# Supplementary material
Source: publisher figshare collection journal article supplement (https://acs.figshare.com/ndownloader/files/3806500)
Supplement: Supplementary file 1 [file 3806500]

# **High Strength Chitosan Hydrogels with Biocompatibility via New Avenue Based on Constructing Nanofibrous Architecture**

Jiangjiang Duan, Xichao Liang, Yan Cao, Sen Wang and Lina Zhang\*

College of Chemistry and Molecular Sciences, Wuhan University,

Wuhan, 430072, China

E-mail: [zhangln@whu.edu.cn](mailto:zhangln@whu.edu.cn)

Phone: +86-27-87219274, 87216311

**Keywords:** chitosan nanofibers, alkali/urea solvent, high strength hydrogels,  
biocompatibility, smart drug release

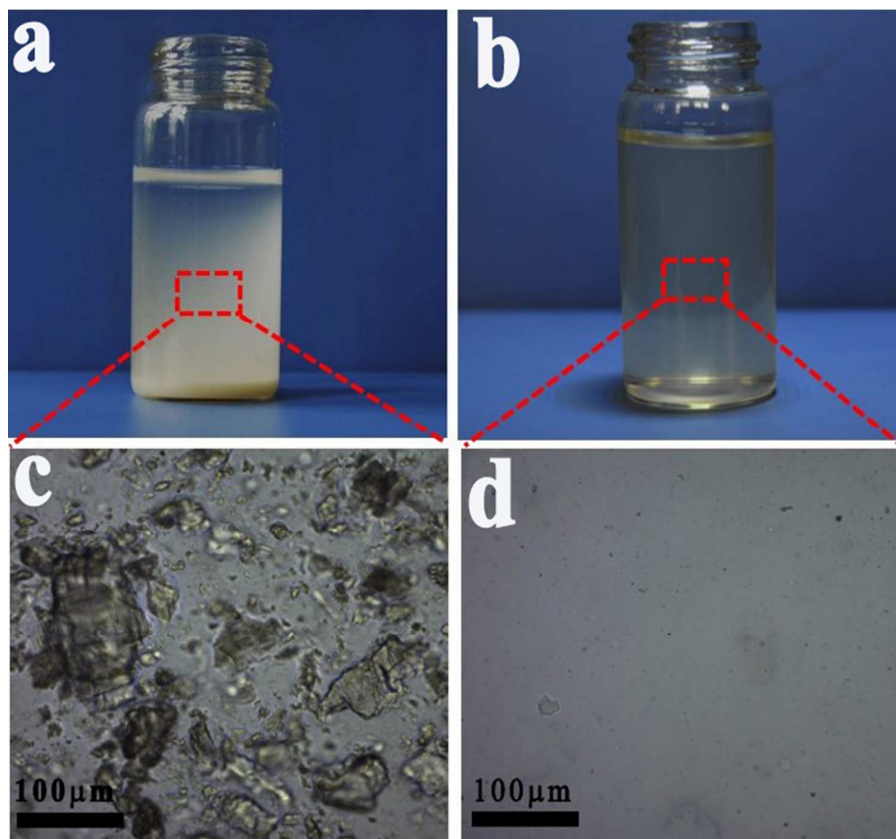

**Figure S1.** Chitosan powders dispersed in alkali/urea aqueous solution before (a, c) and after (b, d) freezing-thawing process.

**Table S1.** Chemical shift of chitosan powder and different chitosan solutions from  $^{13}\text{C}$  NMR

| Sample/Solvent                     | Chemical Shift (ppm) |       |       |                 |       |                 |
|------------------------------------|----------------------|-------|-------|-----------------|-------|-----------------|
|                                    | C1                   | C4    | C5    | C3              | C6    | C2              |
| <b>CS powder<sup>a</sup></b>       | 105.53               | 83.26 | 75.76 | 75.76           | 62.29 | 57.98           |
| <b>Alkaline system<sup>b</sup></b> | 101.78               | 78.42 | 76.42 | 73.79           | 60.34 | 57.09           |
| <b>Acidic system<sup>b</sup></b>   | 97.91,<br>96.83      | 76.42 | 74.87 | 70.38,<br>69.30 | 59.56 | 56.16,<br>54.92 |

<sup>a</sup> Results from solid state  $^{13}\text{C}$  NMR. <sup>b</sup> Results from liquid  $^{13}\text{C}$  NMR

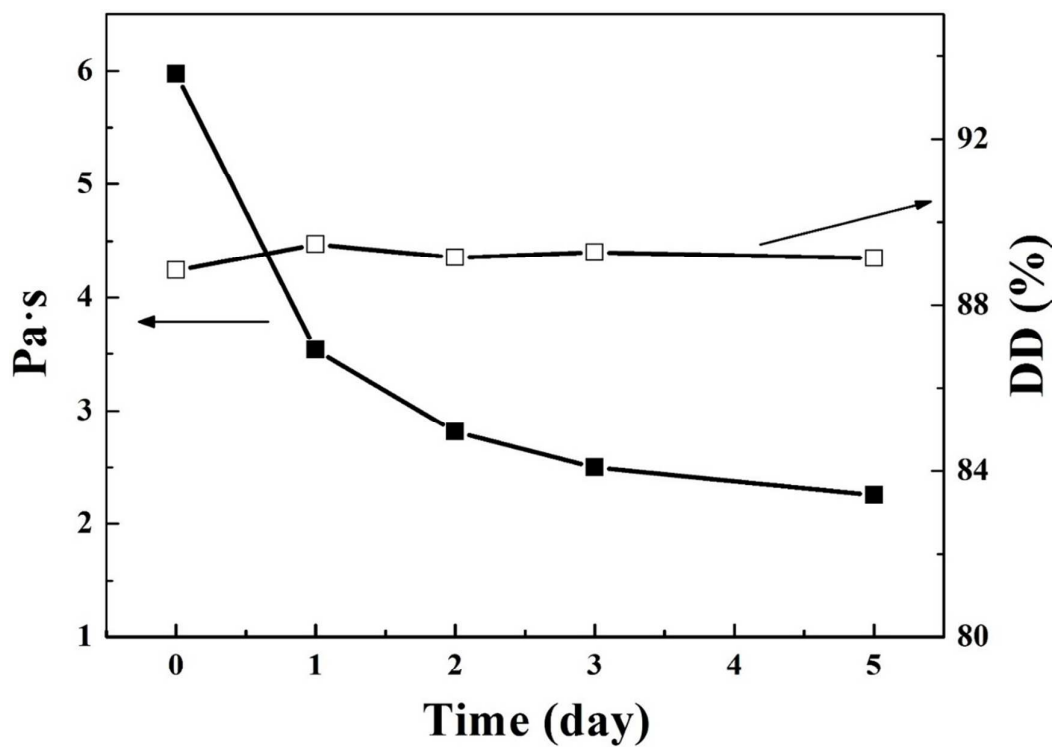

**Figure S2.** Dependence of zero-shear viscosity and DD of chitosan dissolved in alkaline solution on its storage time.

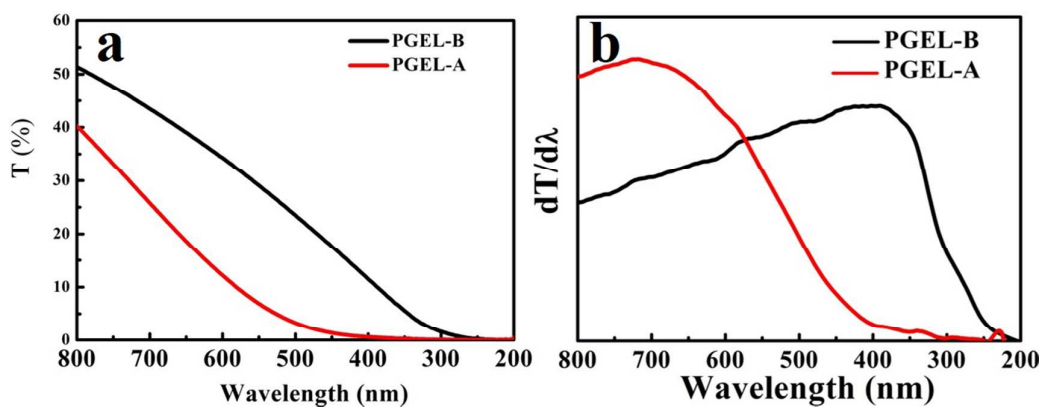

**Figure S3.** The light transmittance curves (a) and their differential curves (b) of the two kind of chitosan hydrogels in the range of visible light.

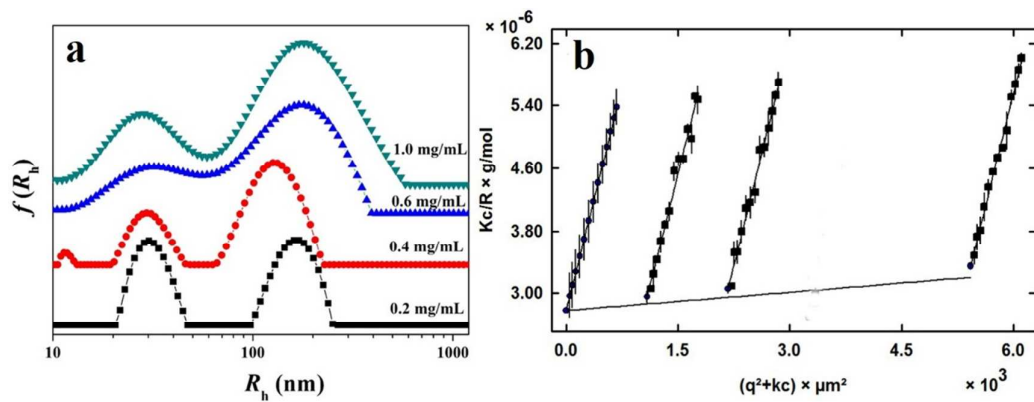

**Figure S4.** The hydrodynamic radius distributions (a) and Zimm plots (b) of chitosan alkaline solution at 10 °C.

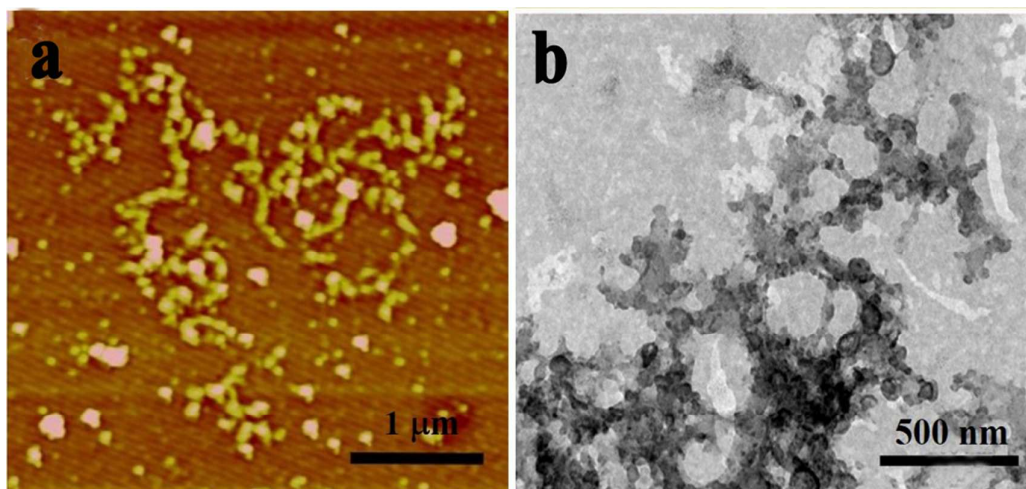

**Figure S5.** AFM image (a) and TEM image (b) of chitosan aggregates regenerated by sodium hydroxide from dilute chitosan acidic solution with a concentration of  $1 \times 10^{-4}$  g/mL.

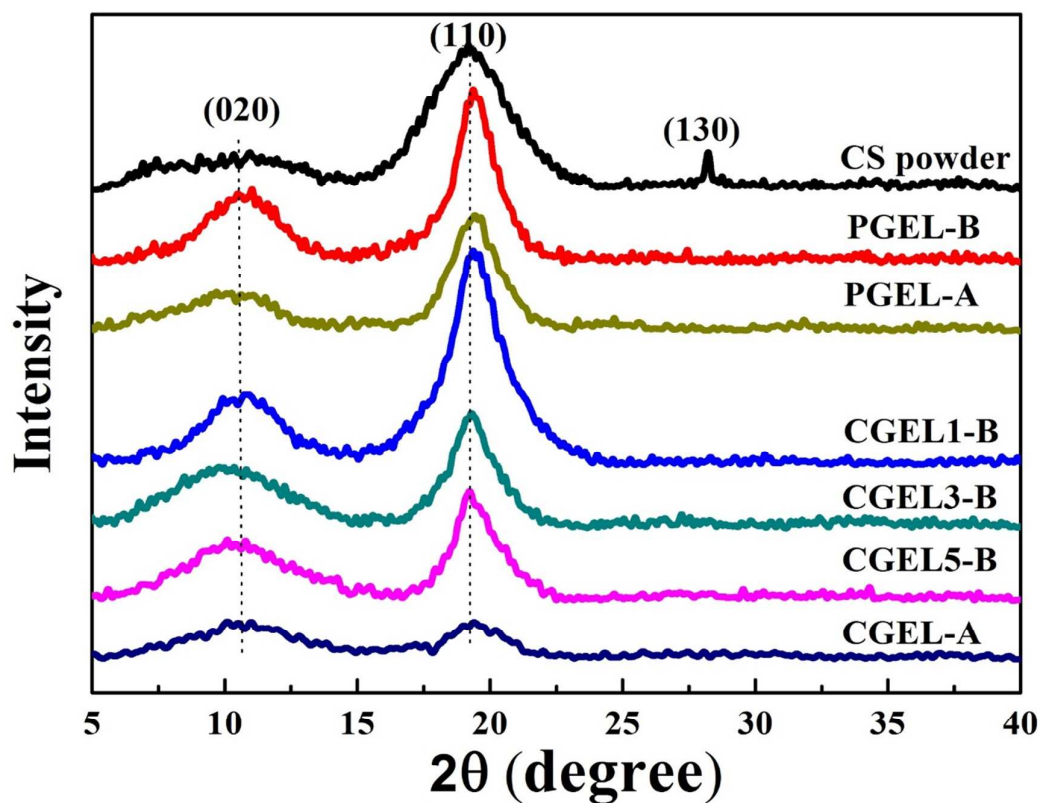

**Figure S6.** The XRD patterns of chitosan powders, chitosan physical and chemical hydrogel constructed from the two solvent systems.

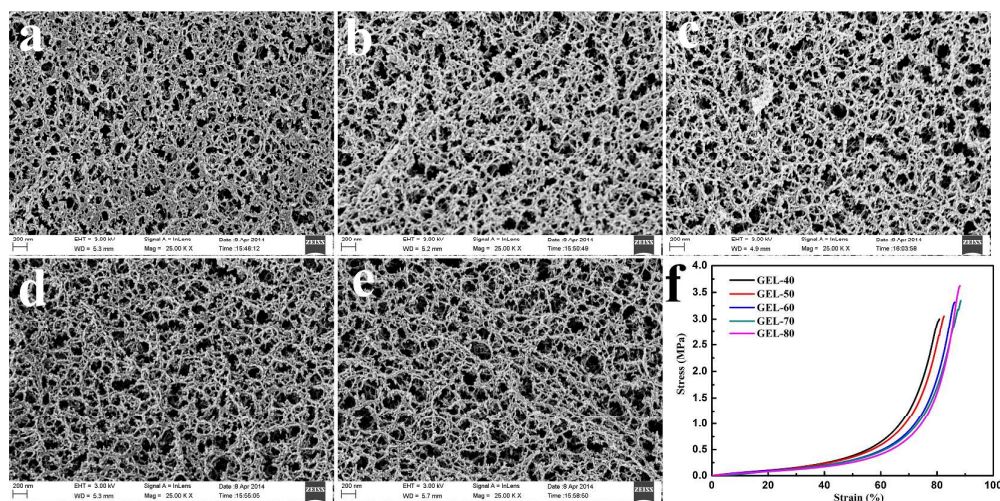

**Figure S7.** SEM images of chitosan physical hydrogel regenerated from hot water with different temperature (from 40, 50, 60, 70, to 80 °C for a ~ e). The compressive

stress-strain curves (f) of chitosan hydrogels regenerated from hot water with different temperature.

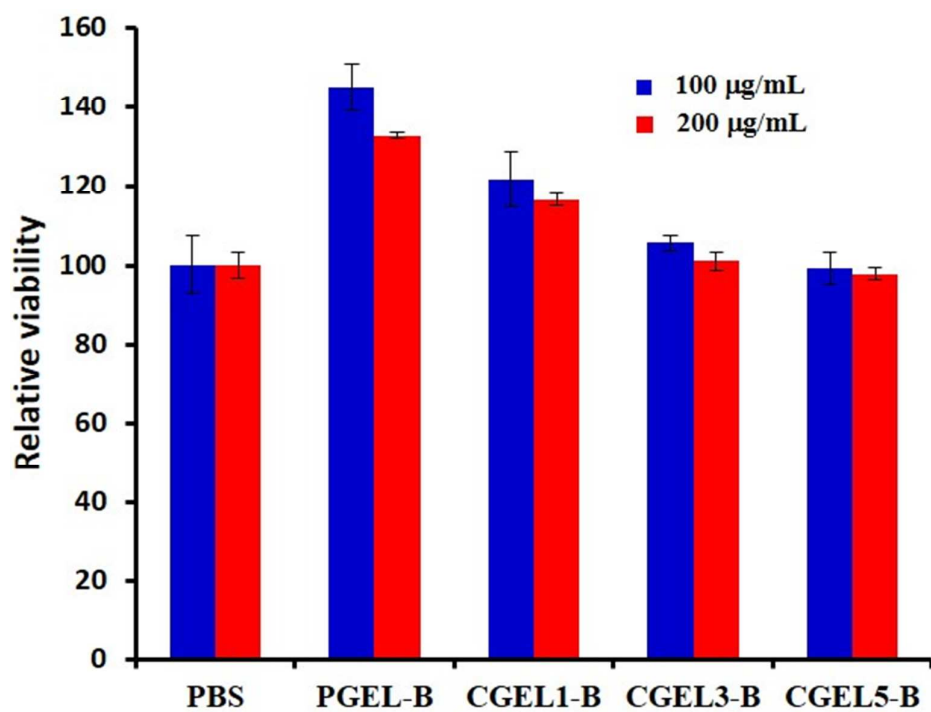

**Figure S8.** The C2C12 cells vitro cytotoxicity tests on different chitosan hydrogel samples.

**Table S2.** Comparison of compression mechanical properties of different high strength hydrogels

| Samples             | $\sigma$ (MPa) | $\epsilon$ (%) | E (MPa) | Sources   |
|---------------------|----------------|----------------|---------|-----------|
| PGEL-B              | 3.31           | 85.9           | 0.60    | This work |
| CGEL3-B             | 4.25           | 82.8           | 0.34    | This work |
| GO/PVA              | 1.3            |                |         | Ref. 1    |
| Tetra-PEG           | 2.7            | 85             |         | Ref. 2    |
| Agarose             | 0.28           | 20             |         | Ref. 2    |
| Cellulose           | 0.44           | 55             |         | Ref. 3    |
| Chitin/chitosan     | 0.135          |                | 0.169   | Ref. 4    |
| Cellulose nanofiber | 5.4            |                | 35.2    | Ref. 5    |
| BC/Gelatin          | 5.3            | 3.9            | 44      | Ref. 6    |

## References

1. Zhang, L.; Wang, Z.; Xu, C.; Li, Y.; Gao, J.; Wang, W.; Liu, Y. *J. Mater. Chem.* **2011**, *21*, 10399-10406.
2. Sakai, T.; Matsunaga, T.; Yamamoto, Y.; Ito, C.; Yoshida, R.; Suzuki, S.; Sasaki, N.; Shibayama, M.; Chung, U. *Macromolecules* **2008**, *41*, 5379-5384
3. He, M.; Zhao, Y.; Duan, J.; Wang, Z.; Chen, Y.; Zhang, L. *ACS Appl. Mater. Interfaces*. **2014**, *6*, 1872–1878.
4. Araki, J.; Yamanaka, Y.; Ohkawa, K. *Polym. J.* **2012**, *44*, 713–717
5. Abe, K.; Yano, H. *Cellulose* **2012**, *19*, 1907–1912.
6. Nakayama, A.; Kakugo, A.; Gong, J. P. Osada, Y.; Takai, M.; Erata, T.; Kawano, S. *Adv. Funct. Mater.* **2004**, *14*, 1124-1128.
